# Supplementary material for: Ontogeny of Toll-Like Receptor Mediated Cytokine Responses of Human Blood Mononuclear Cells
Source: PLoS One. 2010 Nov 30;5(11):e15041. doi: 10.1371/journal.pone.0015041 (PMC2994830; doi:10.1371/journal.pone.0015041)
Supplement: Table S2 — Flow cytometric comparison of the mean fluorescent intensity for longitudinal neonatal and adult responses to TLR stimulation. Statistical analysis of average mean fluorescent intensity (MFI) of the given gated cell population (monocyte, cDC, or pDC that express a given cytokine in intracellular flow cytometric analysis). Statistically significant (p<0.01) differences between age groups are indicated in bold type-set. MFIs for each population are derived from the FloJo software, with variance represented as standard deviation calculated using Prism 5. ND = not detectable. (XLSX) [file pone.0015041.s005.xlsx]

## Sheet: Sheet1
				IFNa+ MFI				IL12+ MFI				IL6+ MFI				TNFa+ MFI
	TLR ligand	TLR		Mean ± SD	p values			Mean ± SD	p values			Mean ± SD	p values			Mean ± SD	p values
monocytes
	Pam3CSK4	2 & 1	2	ND				ND				2635 ± 530			2	6887 ± 2608			2
			1									2435 ± 656		1	0.0585	8488 ± 3498		1	0.0938
			0									2776 ± 1038	0	0.0313	0.2188	5811 ± 2594	0	0.0313	0.3125
	LPS	4	2	ND				ND				2521 ± 462			2	8570 ± 3114			2
			1									2553 ± 331		1	0.791	9346 ± 2802		1	0.2661
			0									3078 ± 862	0	0.0771	0.0498	6935 ± 2157	0	0.0024	0.0166
	3M003	7 & 8	2	ND				3461 ± 1405			2	3337 ± 755			2	30253 ± 8722			2
			1					4109 ± 2744		1	0.5693	3265 ± 815		1	1	34874± 8384		1	0.0522
			0					5385 ± 1580	0	0.064	0.0122	4115 ± 903	0	0.0342	0.0923	25354 ± 6323	0	0.0034	0.0015
cDC
	Pam3CSK4	2 & 1	2	ND				ND				2719 ± 819			2	14799 ± 8001			2
			1									2482 ± 446		1	0.2334	13375 ± 7389		1	0.4697
			0									2728 ± 696	0	0.1294	0.9697	12714 ± 5267	0	0.791	0.3804
	LPS	4	2	ND				ND				2358 ± 460			2	17130 ± 7019			2
			1									2135 ± 268		1	0.0771	13671 ± 5033		1	0.0425
			0									2696 ± 652	0	0.0049	0.0425	14612 ± 6892	0	0.791	0.1071
	3M003	7 & 8	2	ND				6216 ± 2268			2	2389 ± 453			2	37801 ± 12285			2
			1					6053 ± 2082		1	0.0771	2429 ± 559		1	0.8501	40805 ± 11840		1	0.1099
			0					9161 ± 2339	0	0.7334	0.6772	2724 ± 417	0	0.1099	0.0269	28216 ± 8077	0	0.001	0.0024
pDC
	3M003	7 & 8	2	6220 ± 1878			2	ND				ND				6808 ± 2768			2
			1	7144 ± 3075		1	0.1099									6560 ± 3421		1	0.2661
			0	3562 ± 1498	0	0.0024	0.0161									2579 ± 1149	0	0.0005	0.0005
	CpGA	9	2	10604 ± 2898			2	ND				ND				7609 ± 2939			2
			1	9818 ± 2324		1	0.9697									5728 ± 2874		1	0.0024
			0	7799 ± 1908	0	0.0425	0.0269									4453 ± 1795	0	0.2036	0.0068
