# Supplementary material for: Ontogeny of Toll-Like Receptor Mediated Cytokine Responses of Human Blood Mononuclear Cells
Source: PLoS One. 2010 Nov 30;5(11):e15041. doi: 10.1371/journal.pone.0015041 (PMC2994830; doi:10.1371/journal.pone.0015041)
Supplement: Table S3 — Comparison of the concentrations of secreted cytokines for longitudinal neonatal and adult responses to TLR stimulation. Cytokines secreted MC in tissue culture media containing the indicated TLR ligands were determined in pg/ml for 35 neonate-infant subjects and 25 adult subjects. Statistically significant (p<0.01) differences between age groups are indicated in bold type-set. NP = not performed. (XLSX) [file pone.0015041.s006.xlsx]

## Sheet: EXPORT table
		PAM					pIC					LPS					3M-003					CpG-A
Cytokine	year	Mean ± SD	p values				Mean ± SD	p values				Mean ± SD	p values				Mean ± SD	p values				Mean ± SD	p values
IFNa2	A	66.9 ± 104.3				A	357.8 ± 519.3				A	75.6 ± 99.7				A	516 ± 468				A	520.7 ± 477.7				A
	2	9.8 ± 13.7			2	0.000290275	58.2 ± 74.2			2	0.000101509	9.7 ± 14			2	< 0.0001	507.6 ± 470.4			2	0.989747	1673 ± 1602			2	0.209486
	1	11.2 ± 22.6		1	0.5315	0.000216958	108.7 ± 97.3		1	0.0073	0.0167025	9.1 ± 15		1	0.3838	< 0.0001	866.4 ± 1326.8		1	0.0189	0.241181	976.7 ± 937.2		1	0.0406	0.536065
	0	15.4 ± 18.4	0	0.0532	0.3219	0.0132458	223.5 ± 300	0	0.0086	< 0.0001	0.328576	14 ± 21.3	0	0.0765	0.5312	0.00166012	73.4 ± 72.5	0	< 0.0001	< 0.0001	< 0.0001	1206.4 ± 811.4	0	< 0.0001	0.0032	0.000851564
IFN-g	A	111.2 ± 229.5				A	951.5 ± 1182.6				A	190.4 ± 307.1				A	4043.4 ± 3155.5				A	7.5 ± 8.9				A
	2	39.8 ± 82.3			2	0.839473	177.6 ± 285			2	0.00137149	152.3 ± 260.8			2	0.833389	1645.6 ± 1748.1			2	0.00497767	6.5 ± 11.9			2	0.50848
	1	59.7 ± 169.2		1	0.5189	0.736629	57.9 ± 99.6		1	0.0036	< 0.0001	106.4 ± 194.4		1	0.416	0.207712	1504.8 ± 2514.9		1	0.1099	0.000660352	10.7 ± 10.8		1	0.0369	0.10498
	0	38.4 ± 83.3	0	0.372	0.7024	0.695684	211.8 ± 443.1	0	0.0014	0.6043	0.00137097	32.9 ± 62.3	0	0.0339	0.0009	0.00798086	2436.3 ± 2333	0	0.0028	0.2837	0.064124	27.3 ± 55.7	0	0.6629	0.1689	0.263378
IL-12p70	A	4.4 ± 2.3				A	132.5 ± 51				A	13.7 ± 5.1				A	103.1 ± 28.1				A	1.4 ± 0.2				A
	2	9.9 ± 1.1			2	< 0.0001	62.2 ± 13.9			2	0.087182	16.2 ± 2.6			2	0.00454653	33.9 ± 6.7			2	0.00258314	1.1 ± 0.1			2	< 0.0001
	1	3.7 ± 1.3		1	0.0003	0.714516	33.2 ± 6.3		1	0.0055	0.00305892	8.1 ± 1.4		1	0.0052	0.516812	23.6 ± 2.8		1	0.0406	< 0.0001	9.5 ± 1.1		1	< 0.0001	0.950578
	0	1.3 ± 0.3	0	0.0455	< 0.0001	0.0843112	28.8 ± 5.5	0	0.6406	0.0021	0.00165722	2.8 ± 0.6	0	< 0.0001	< 0.0001	0.00427168	18.8 ± 3.1	0	0.2482	0.007	< 0.0001	4.5 ± 2.4	0	0.2918	< 0.0001	0.941504
IL-12p40	A	791.2 ± 950.9				A	868.5 ± 791.9				A	1197.1 ± 994.7				A	5886.6 ± 3684.4				A	45.8 ± 69.6				A
	2	22.3 ± 23.6			2	< 0.0001	81.4 ± 125.6			2	< 0.0001	31.4 ± 33.6			2	< 0.0001	137.9 ± 120.1			2	< 0.0001	9.5 ± 19.1			2	< 0.0001
	1	54.1 ± 58.7		1	0.0129	< 0.0001	35.7 ± 58.6		1	0.0613	< 0.0001	79.3 ± 66.1		1	0.0046	< 0.0001	208.8 ± 134.8		1	0.0139	< 0.0001	5.7 ± 11.1		1	0.9032	< 0.0001
	0	241.9 ± 389.6	0	0.0103	< 0.0001	0.00242972	143.8 ± 158.6	0	0.0018	0.1042	< 0.0001	597.3 ± 1040.4	0	0.0009	< 0.0001	0.000694225	1688.8 ± 2364	0	< 0.0001	< 0.0001	< 0.0001	170.9 ± 225	0	0.0026	0.0018	< 0.0001
IL-23	A	4.4 ± 21.8				A	NP					156.1 ± 147.3				A	74.9 ± 94.1				A	NP
	2	20.3 ± 50.8			2	0.0042						120.3 ± 114.8			2	0.8699	67.3 ± 71.7			2	0.7096
	1	60.5 ± 43		1	0.0366	< 0.0001						181 ± 205.1		1	0.9658	0.5565	91.1 ± 64.9		1	0.1748	0.2509
	0	50.4 ± 78	0	0.75	1	0.0119						242.4 ± 191.2	0	0.5	0.0234	0.166	246.4 ± 226.2	0	0.5	0.1094	0.0021
IL-6	A	85481.4 ± 13999.2				A	4974.3 ± 1454.3				A	85771.7 ± 14027.2				A	43930.1 ± 9860.5				A	1021.2 ± 219.1				A
	2	17404.1 ± 4217.5			2	0.000462668	497.2 ± 102.7			2	< 0.0001	18263.2 ± 4350.4			2	0.00034324	5378.4 ± 947			2	< 0.0001	699.3 ± 82.4			2	< 0.0001
	1	30849.2 ± 2991.4		1	0.0021	0.000471584	808 ± 308.3		1	0.5765	< 0.0001	31784 ± 3108		1	0.0015	0.000475079	10530 ± 1559.5		1	0.0081	< 0.0001	190.1 ± 39.2		1	< 0.0001	0.0136874
	0	59621.8 ± 6530.2	0	0.0003	< 0.0001	0.00710754	3792.3 ± 673.2	0	< 0.0001	< 0.0001	0.473863	68631.6 ± 7254.3	0	< 0.0001	< 0.0001	0.0316385	42820.7 ± 6017.8	0	< 0.0001	< 0.0001	0.525336	1213 ± 276.7	0	0.2834	0.0004	0.23737
TNFa	A	1447.5 ± 1620.2				A	268.1 ± 513.1				A	2615.5 ± 1845.1				A	8117.4 ± 5816.1				A	46.2 ± 78.7				A
	2	2215.4 ± 2749.5			2	0.32854	258.7 ± 322.2			2	0.567625	2911.6 ± 3180.5			2	0.550421	4297.7 ± 4226.9			2	0.00779332	79.6 ± 51			2	0.914266
	1	1749.8 ± 1091.5		1	0.859	0.0471777	119.1 ± 102.2		1	0.0096	0.344191	2718.6 ± 1674.6		1	0.4949	0.753091	4338.4 ± 2840.2		1	0.4054	0.00526253	168.2 ± 637.2		1	0.1812	0.000366853
	0	914.2 ± 658.6	0	0.0002	0.0101	0.527663	69.8 ± 75.3	0	0.0606	0.0028	0.00797164	1250.3 ± 687.9	0	< 0.0001	0.013	0.00104741	7583.7 ± 4954.2	0	0.0035	0.0063	0.773648	51.4 ± 62.6	0	0.0011	0.4049	0.272032
IL-1b	A	2775.5 ± 1086.6				A	379.4 ± 255.9				A	5990.5 ± 1673				A	19210.9 ± 4112.2				A	24.4 ± 8.7				A
	2	3765.5 ± 833.5			2	0.703119	119.2 ± 18.4			2	0.261186	6194.6 ± 1080.2			2	0.599929	8366.4 ± 1308.8			2	0.000246855	8.7 ± 2.1			2	0.0205131
	1	2591.7 ± 330.4		1	0.9925	0.457531	45.4 ± 5.9		1	0.0007	0.328601	5367.3 ± 512.3		1	0.6877	0.669401	9996.1 ± 892.5		1	0.0871	0.000741742	35.4 ± 10.4		1	0.0613	0.286299
	0	1334.8 ± 258.5	0	0.0003	0.0175	0.169398	76.9 ± 12.8	0	0.0313	0.1099	0.785136	2487.9 ± 265.2	0	< 0.0001	0.004	0.000857691	16281.3 ± 1522.9	0	0.0013	0.0008	0.416597	20.6 ± 13.1	0	0.1288	0.1664	0.0193174
IL-10	A	87 ± 37.9				A	7.8 ± 4.9				A	261.2 ± 71				A	68.4 ± 21				A	13.1 ± 6.5				A
	2	46.4 ± 10.7			2	0.156673	9.8 ± 1.9			2	0.311622	167.4 ± 30.7			2	0.120402	90.6 ± 19.6			2	0.989708	47.3 ± 12.4			2	0.0407255
	1	97 ± 14.7		1	0.0041	0.0315689	12.8 ± 1.5		1	0.332	< 0.0001	250 ± 31.2		1	0.0942	0.625331	187.8 ± 35.9		1	0.0069	0.000833632	98.9 ± 14.3		1	0.0003	< 0.0001
	0	107.5 ± 15.2	0	0.6174	0.0012	0.0037145	17.1 ± 2.5	0	0.034	0.0308	< 0.0001	297 ± 50.9	0	0.6406	0.0091	0.483598	432.8 ± 79.4	0	0.0015	< 0.0001	< 0.0001	167.3 ± 18.6	0	0.0005	< 0.0001	< 0.0001
